# Supplementary material for: Early neuromuscular blocking agents for adults with acute respiratory distress syndrome: a systematic review, meta-analysis and meta-regression
Source: HighWire-hosted journal article supplement (doi:10.1136/bmjopen-2020-037737), 2020-11-01
Supplement: bmjopen-2020-037737supp004_data_supplement.pdf [file bmjopen-2020-037737supp004_data_supplement.pdf]

|                 | Random sequence generation (selection bias) | Allocation concealment (selection bias) | Blinding of participants and personnel (performance bias) | Blinding of outcome assessment (detection bias) | Incomplete outcome data (attrition bias) | Selective reporting (reporting bias) | Other bias |
|-----------------|---------------------------------------------|-----------------------------------------|-----------------------------------------------------------|-------------------------------------------------|------------------------------------------|--------------------------------------|------------|
| Forel2006       | ?                                           | ?                                       | —                                                         | +                                               | +                                        | +                                    | ?          |
| Gainnier2004    | ?                                           | ?                                       | +                                                         | +                                               | +                                        | +                                    | ?          |
| Guervilly2017   | +                                           | ?                                       | —                                                         | +                                               | +                                        | +                                    | ?          |
| Lyu Guangyu2014 | +                                           | ?                                       | ?                                                         | +                                               | +                                        | +                                    | ?          |
| Moss2019        | +                                           | +                                       | —                                                         | +                                               | +                                        | +                                    | ?          |
| Papazian2010    | +                                           | +                                       | +                                                         | +                                               | +                                        | +                                    | ?          |
| Yirao 2016      | +                                           | +                                       | —                                                         | +                                               | +                                        | +                                    | ?          |
