# Supplementary material for: Early neuromuscular blocking agents for adults with acute respiratory distress syndrome: a systematic review, meta-analysis and meta-regression
Source: HighWire-hosted journal article supplement (doi:10.1136/bmjopen-2020-037737), 2020-11-01
Supplement: bmjopen-2020-037737supp016_data_supplement.pdf [file bmjopen-2020-037737supp016_data_supplement.pdf]

PaO2/FiO2 in 72h for ARDS patients

Patient or population: patients with ARDS patients

Settings:

Intervention: PaO2/FiO2 in 72h

| Outcomes         | Illustrative comparative risks* (95% CI) |                                                                                                           | Relative effect<br>(95% CI) | No of Participants<br>(studies) | Quality of the evidence<br>(GRADE)   | Comments |
|------------------|------------------------------------------|-----------------------------------------------------------------------------------------------------------|-----------------------------|---------------------------------|--------------------------------------|----------|
|                  | Assumed risk                             | Corresponding risk                                                                                        |                             |                                 |                                      |          |
|                  | Control                                  | PaO2/FiO2 in 72h                                                                                          |                             |                                 |                                      |          |
| PaO2/FiO2 in 72h |                                          | The mean pao2/fio2 in 72h in the intervention groups was<br><b>12.27 higher</b><br>(4.65 to 19.89 higher) |                             | 1437<br>(4 studies)             | ⊕ ⊕ ⊕ ⊕<br><b>low</b> <sup>1,2</sup> |          |

\*The basis for the **assumed risk** (e.g. the median control group risk across studies) is provided in footnotes. The **corresponding risk** (and its 95% confidence interval) is based on the assumed risk in the comparison group and the **relative effect** of the intervention (and its 95% CI).

CI: Confidence interval;

GRADE Working Group grades of evidence

High quality: Further research is very unlikely to change our confidence in the estimate of effect.

Moderate quality: Further research is likely to have an important impact on our confidence in the estimate of effect and may change the estimate.

Low quality: Further research is very likely to have an important impact on our confidence in the estimate of effect and is likely to change the estimate.

Very low quality: We are very uncertain about the estimate.

<sup>1</sup> The results of the four studies were not consistent

<sup>2</sup> No more than 150 patients were included in two trials

Supplemental Table.5 GRADE system: PaO2/FiO2 at 72hrs for ARDS patients
