# Supplementary figures and images for: Early neuromuscular blocking agents for adults with acute respiratory distress syndrome: a systematic review, meta-analysis and meta-regression
Source: HighWire-hosted journal article supplement (doi:10.1136/bmjopen-2020-037737), 2020-11-01

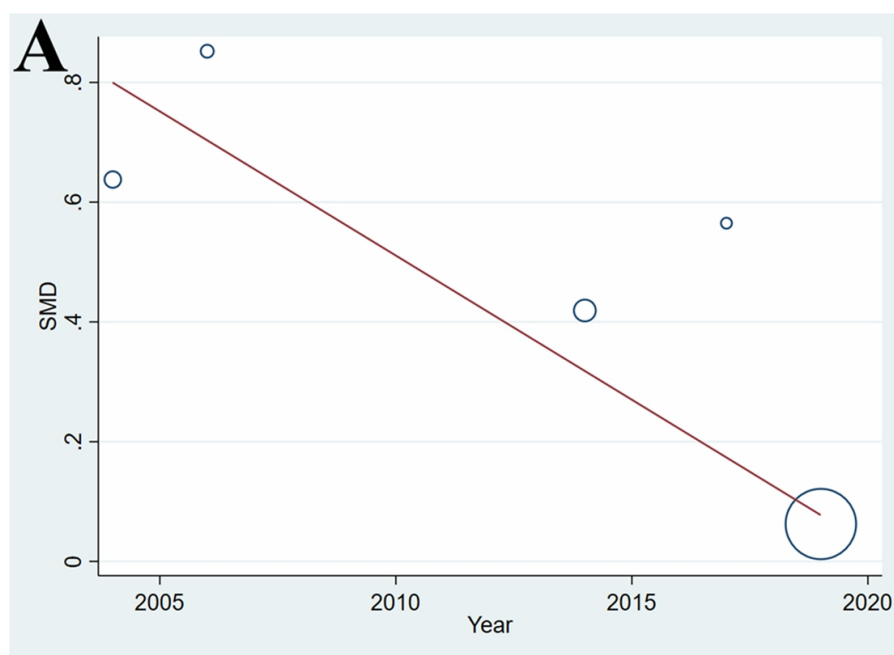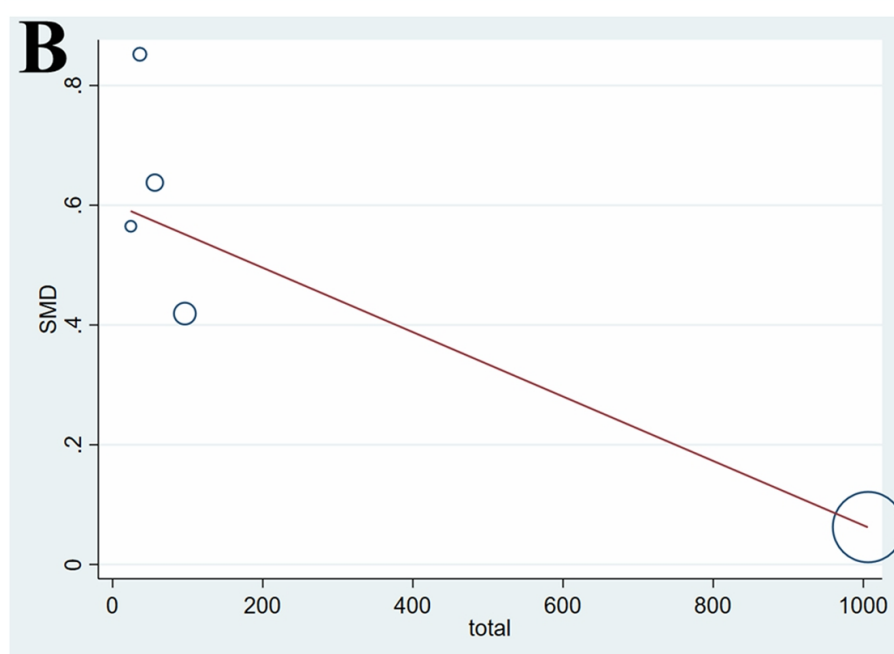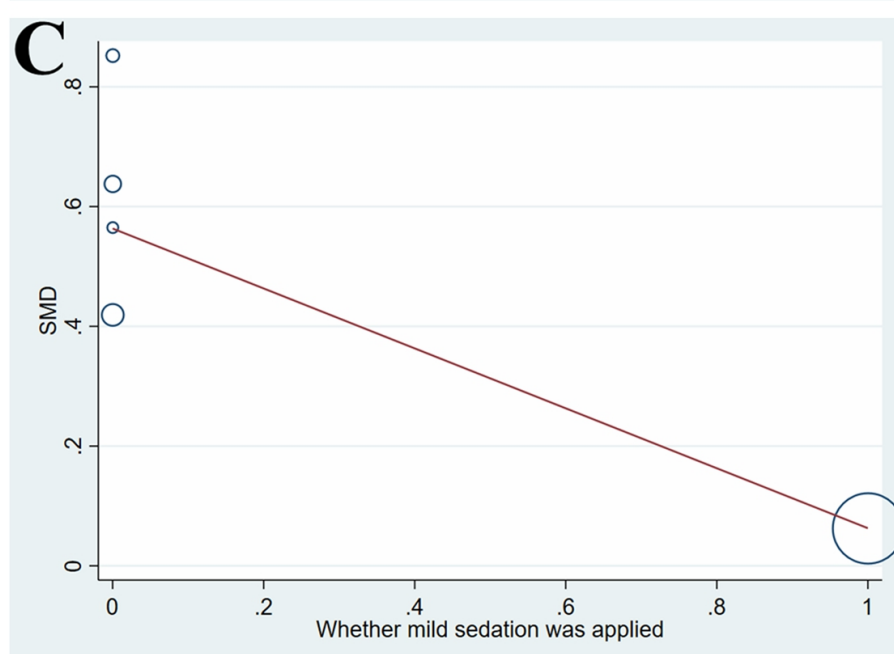

Supplement: bmjopen-2020-037737supp006_data_supplement.pdf [file bmjopen-2020-037737supp006_data_supplement.pdf]

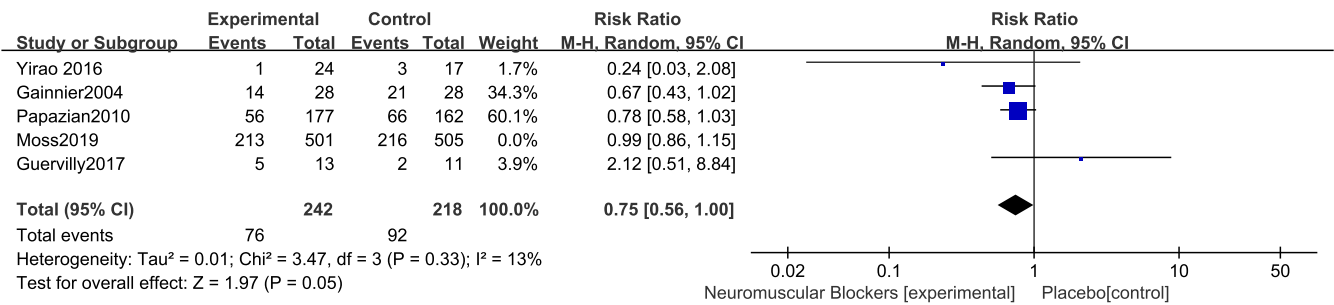

Supplement: bmjopen-2020-037737supp007_data_supplement.pdf [file bmjopen-2020-037737supp007_data_supplement.pdf]
